# Supplementary material for: Development and application of mass spectrometric molecular networking for analyzing the ingredients of areca nut
Source: Royal Society of Chemistry journal article supplement (doi:10.1039/d3mo00232b), 2023-12-20
Supplement: d3mo00232b1.pdf [file d3mo00232b1.pdf]

**Arecoline**

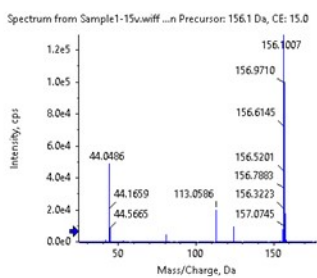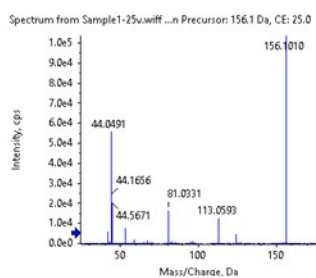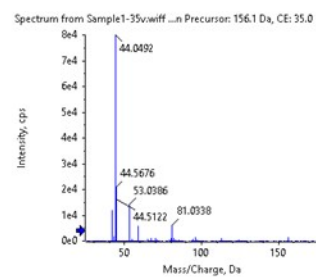

**Arecaidine**

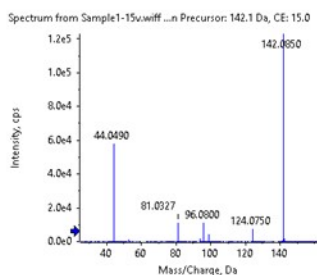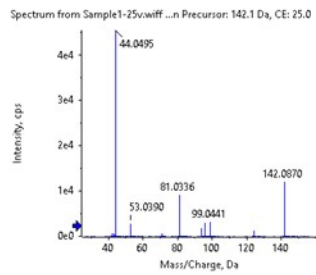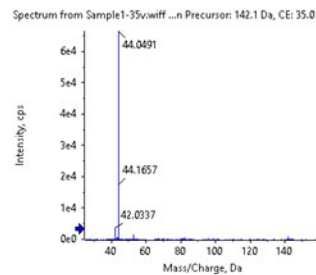

**Guvacoline**

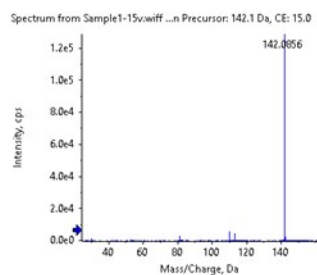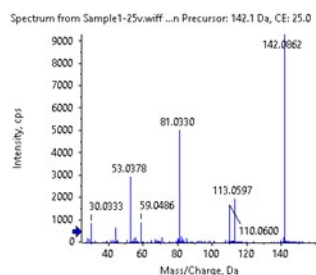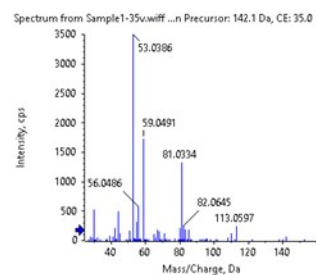

**15eV**

**25eV**

**35eV**

**Figure S1. Optimization of Positive Ion Mode in Mass Spectrometry**

**Quercetin**

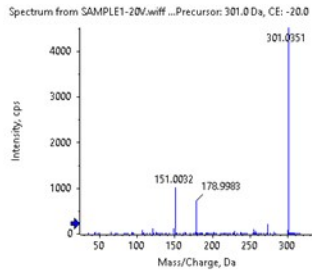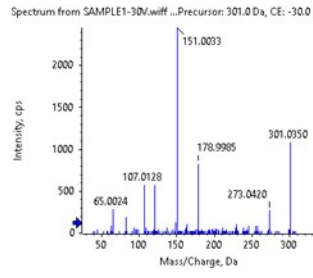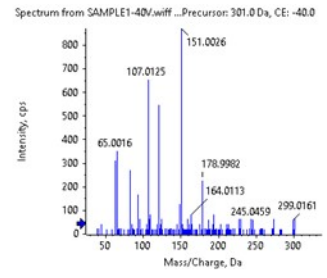

**Epicatechin**

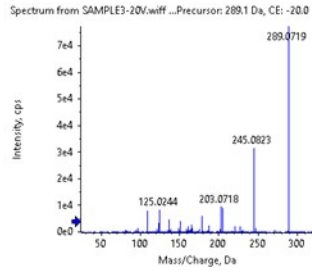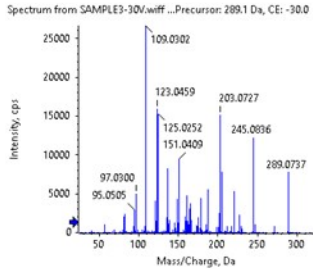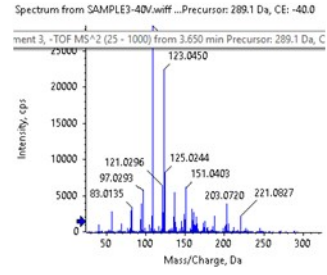

**Rutin**

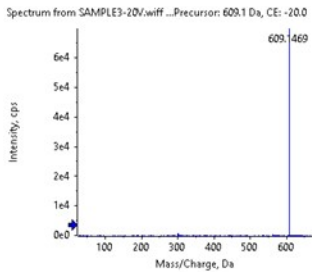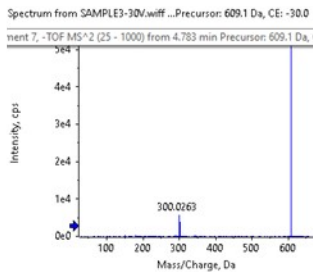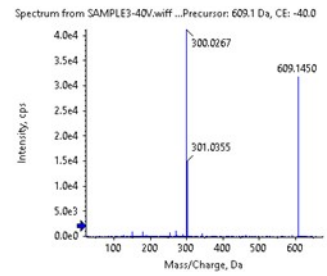

**20eV**

**30eV**

**40eV**

**Figure S2. Optimization of negative ion modes in mass spectrometry**

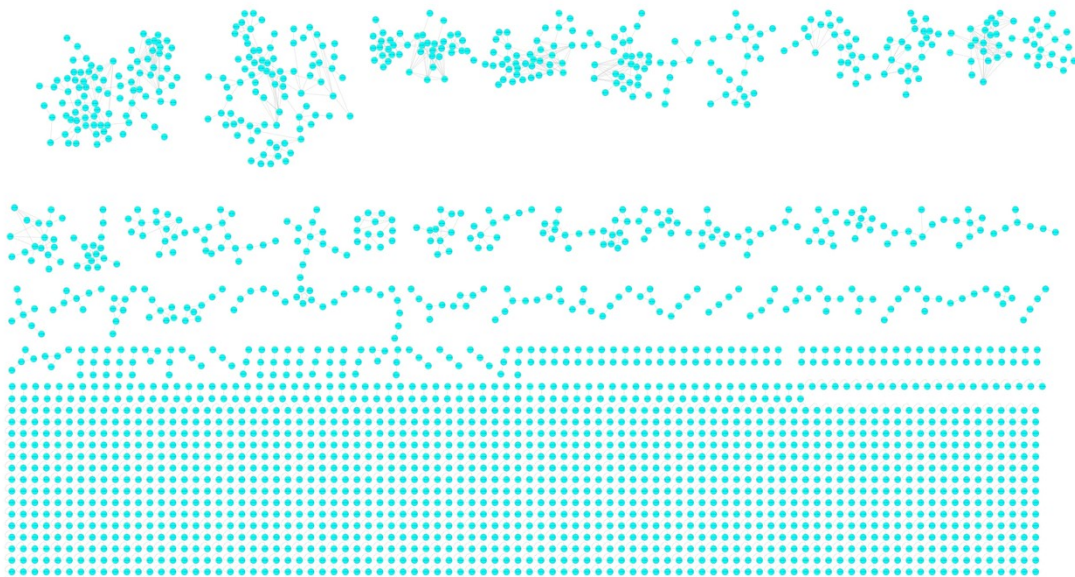

**Figure S3. Molecular network diagram of positive ions**

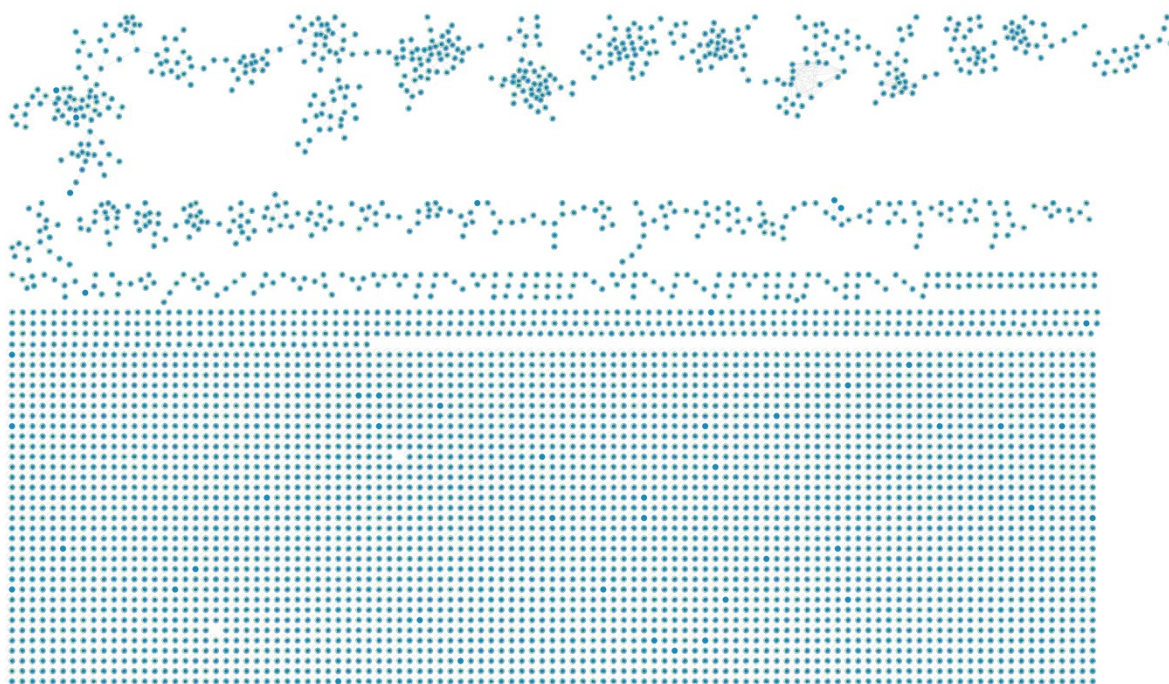

**Figure S4. Molecular network diagram of negative ions**

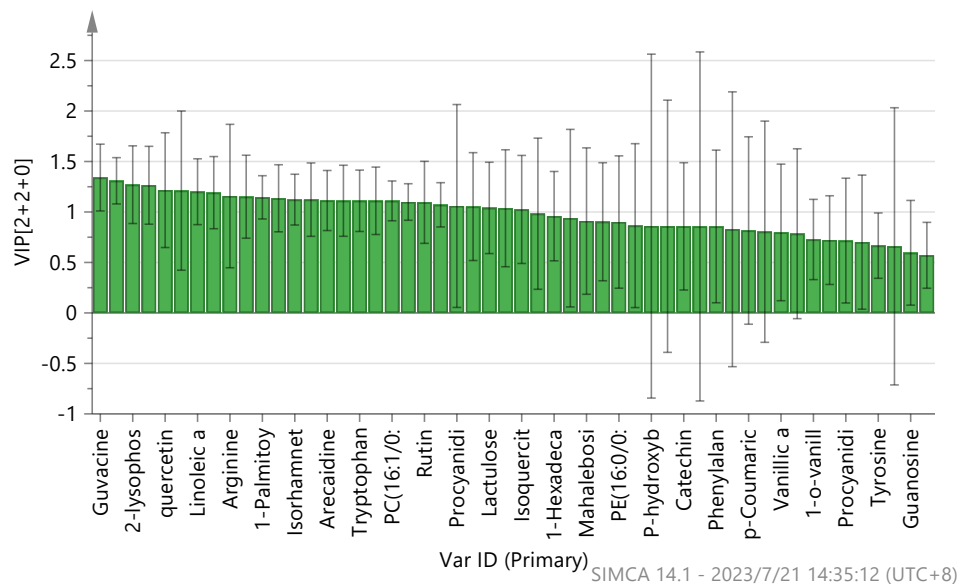

**Figure S5. VIP score for differential metabolites**

**Table S1. Differential compound information of areca nut at different growth stages**

| Classification | Order | Component                                      | Adduct ion name                   | P Value | VIP Score |
|----------------|-------|------------------------------------------------|-----------------------------------|---------|-----------|
| Phenols        | 1     | Isoquercitrin                                  | [M+H] <sup>+</sup>                | <0.05   | 1.02505   |
|                | 2     | Kaempferol-3-o-rutinoside                      | [M+H] <sup>+</sup>                | <0.05   | 1.0369    |
|                | 3     | Chalconaringenin                               | [M+H] <sup>+</sup>                | <0.05   | 1.05346   |
|                | 4     | Isorhamnetin                                   | [M+H] <sup>+</sup>                | <0.05   | 1.12229   |
|                | 5     | Rutin                                          | [M-H] <sup>-</sup>                | <0.05   | 1.09548   |
|                | 6     | quercetin                                      | [M-H] <sup>-</sup>                | <0.05   | 1.2162    |
| Alkaloid       | 7     | n-Butyl-1-methyl-1,2,5,6-tetrahydro nicotinate | [M+H] <sup>+</sup>                | <0.05   | 1.21162   |
|                | 8     | Arecoline                                      | [M+H] <sup>+</sup>                | <0.05   | 1.26452   |
|                | 9     | Arecaidine                                     | [M+H] <sup>+</sup>                | <0.05   | 1.11351   |
|                | 10    | Guvacoline                                     | [M+H] <sup>+</sup>                | <0.05   | 1.30883   |
|                | 11    | Guvacine                                       | [M+H] <sup>+</sup>                | <0.05   | 1.34085   |
|                | 12    | Methyl nicotinate                              | [M+H] <sup>+</sup>                | <0.05   | 1.11072   |
| Lipid          | 13    | PE(18:2/0:0)                                   | [M+H] <sup>+</sup>                | <0.05   | 1.13561   |
|                | 14    | PE(18:1/0:0)                                   | [M+H] <sup>+</sup>                | <0.05   | 1.09883   |
|                | 15    | PC(18:2/0:0)                                   | [M+H] <sup>+</sup>                | <0.05   | 1.1222    |
|                | 16    | 2-lysophosphatidylcholine                      | [M+H] <sup>+</sup>                | <0.05   | 1.27038   |
|                | 17    | PC(16:1/0:0)                                   | [M+H] <sup>+</sup>                | <0.05   | 1.10996   |
|                | 18    | 1-Palmitoyl-sn-glycero-3-phosphocholine        | [M+H] <sup>+</sup>                | <0.05   | 1.14493   |
| Amino acid     | 19    | Linoleic acid                                  | [M+H] <sup>+</sup>                | <0.05   | 1.20066   |
|                | 20    | Linolenic acid                                 | [M+H] <sup>+</sup>                | <0.05   | 1.15107   |
|                | 21    | Tryptophan                                     | [M+H] <sup>+</sup>                | <0.05   | 1.1108    |
|                | 22    | N-(1-Deoxy-1-fructosyl)phenylalanine           | [M+H] <sup>+</sup>                | <0.05   | 1.11096   |
| Carbohydrate   | 23    | Arginine                                       | [M+H] <sup>+</sup>                | <0.05   | 1.1578    |
|                | 24    | Lactulose                                      | [M+NH <sub>4</sub> ] <sup>+</sup> | <0.05   | 1.04018   |
| Nucleoside     | 25    | Uridine                                        | [M+H] <sup>+</sup>                | <0.05   | 1.19155   |

**Table S2. Validation results of instrument sensitivity for the analytical methods**

| Component   | Adduct ion name    | a              | b            | R <sup>2</sup> | LOD(ng·mL <sup>-1</sup> ) | LOQ(ng·mL <sup>-1</sup> ) | Linear range (ng·mL <sup>-1</sup> ) |
|-------------|--------------------|----------------|--------------|----------------|---------------------------|---------------------------|-------------------------------------|
| Arecoline   | [M+H] <sup>+</sup> | 3,550,695.3567 | 44,681.0278  | 0.9943         | 3                         | 9                         | 12.5-250                            |
| Arecaidine  | [M+H] <sup>+</sup> | 1,060,295.7567 | 16,530.1329  | 0.9945         | 2                         | 10                        | 12.5-500                            |
| Guvacoline  | [M+H] <sup>+</sup> | 703,856.6405   | 15,955.3649  | 0.9997         | 3                         | 12                        | 12.5-500                            |
| Guvacine    | [M+H] <sup>+</sup> | 184,242.7927   | 1,931.3415   | 0.9975         | 3                         | 9                         | 12.5-500                            |
| Quercetin   | [M-H] <sup>-</sup> | 1,194,726.8370 | 18,319.5304  | 0.9999         | 5                         | 15                        | 20-10000                            |
| Epicatechin | [M-H] <sup>-</sup> | 513,679.5136   | -10,432.6999 | 0.9998         | 3                         | 9                         | 20-10000                            |
| Rutin       | [M-H] <sup>-</sup> | 852594.2485    | -21103.6357  | 0.9996         | 2                         | 16                        | 20-10000                            |

**Table S3. Validation results of Intraday and interday precision for the analytical methods**

| Component   | Adduct ion name    | Intraday precision RSD% | Interday precision RSD% | Reproducibility RSD% |
|-------------|--------------------|-------------------------|-------------------------|----------------------|
| Arecoline   | [M+H] <sup>+</sup> | 3.69                    | 10.36                   | 7.36                 |
| Arecaidine  | [M+H] <sup>+</sup> | 3.18                    | 11.86                   | 10.66                |
| Guvacoline  | [M+H] <sup>+</sup> | 8.32                    | 14.52                   | 13.86                |
| Guvacine    | [M+H] <sup>+</sup> | 12.55                   | 13.01                   | 14.36                |
| Quercetin   | [M-H] <sup>-</sup> | 5.69                    | 13.69                   | 12.54                |
| Epicatechin | [M-H] <sup>-</sup> | 11.23                   | 11.63                   | 10.45                |
| Rutin       | [M-H] <sup>-</sup> | 1.56                    | 9.85                    | 8.86                 |

**Table S4. Extraction recovery rate of areca nut extract**

| Component   | Recovery rate(%) |             |             |
|-------------|------------------|-------------|-------------|
|             | 20 ng/mL         | 200 ng/mL   | 1000 ng/mL  |
| Arecoline   | 86.02±1.23       | 90.36±0.92  | 93.21±6.35  |
| Arecaidine  | 96.24±2.47       | 90.43±5.97  | 83.63±3.45  |
| Guvacoline  | 81.36±1.23       | 85.39±12.35 | 82.36±5.46  |
| Guvacine    | 93.14±4.58       | 102.37±7.56 | 100.02±3.89 |
| Quercetin   | 95.74±8.56       | 82.71±1.78  | 92.78±8.10  |
| Epicatechin | 83.67±14.02      | 103.64±6.47 | 91.07±6.57  |
| Rutin       | 92.77±0.23       | 82.77±7.28  | 80.46±8.86  |
